# Supplementary material
Source: Springer Nature journal article supplement (http://www.springermedizin.de/resource/supplementary/13027_2009_159_MOESM3_ESM.pdf/25656606)
Supplement: MOESM3 [file 25656606]

**A**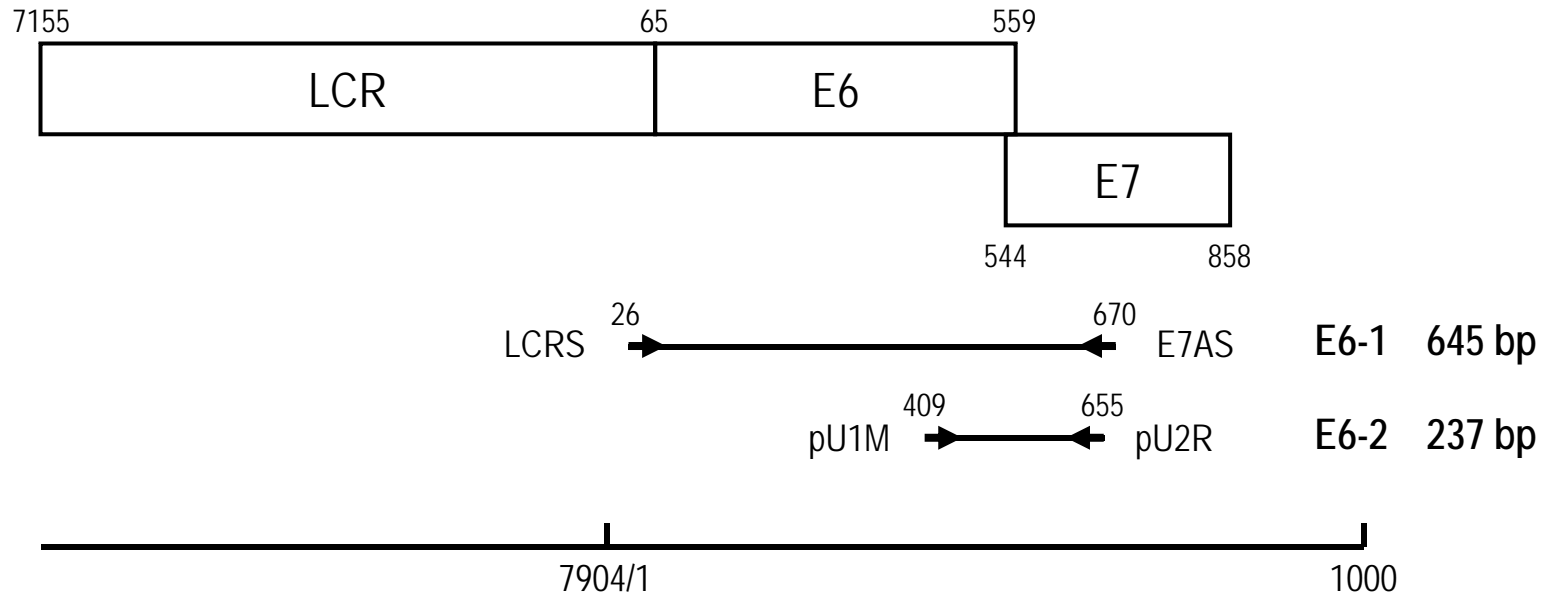**B**

26 **AAGGGCGTAA CCGAAATCGG** TTGAACCGAA ACCGGTTAGT ATAAAAGCAG ACATTTTATG  
 86 CACCAAAGA GAAC TGCAAT TTTCAGGACC CACAGGAGCG ACCCAGAAAG TTACCACAGT  
 146 TATGCACAGA GCTGCAAACA ACTATACATG ATATAATATT AGAATGTGTG TACTGCAAGC  
 206 AACAGTTACT GCGACGTGAG GTATATGACT TTGCTTTTCG GGATTTATGC ATAGTATATA  
 266 GAGATGGGAA TCCATATGCT GTATGTGATA AATGTTTAAA GTTTTATTCT AAAATTAGTG  
 326 AGTATAGACA TTATTGTTAT AGTTTGTATG GAACAACATT AGAACAGCAA TACAACAAAC  
 386 CGTTGTGTGA TTTGTTAATT AGGTGTATTA AC**TGTCAAAA GCCACTGTGT CCTGAAGAAC**  
 446 **AAGCAAAGAC ATCTGGACAA AAAGCAAAGA** TTCCATAATA TAAGGGGTCG GTGGACCGGT  
 506 **GATGTATGTC TTGTTGCAGA TCATCAAGAA** CACGTAGAGA AACCCAGCTG TAA TCATGCT  
 566 **ATGGAGATAC ACCTACATTG CATGAATATA** TGTTAGATTT GCAACCAGAG ACAACTGATC  
 626 **CTACTGTTAT GAGCAATTA ATGACAGCTC** AGAGGAGGAG GATGA
